# Supplementary material
Source: PubMed Central journal article supplement (PMC6905086)
Supplement: NIHMS1061638-supplement-1.pdf [file NIHMS1061638-supplement-1.pdf]

## Studies Included in the Systematic Review and Meta-Analysis (Chronological Order)

- Boyanova L, Gergova G, Nikolov R, et al. Prevalence and evolution of *Helicobacter pylori* resistance to 6 antibacterial agents over 12 years and correlation between susceptibility testing methods. *Diagn Microbiol Infect Dis* 2008;60:409–415.
- Khashei R, Shojaei H, Adibi P, et al. Genetic diversity and drug resistance of *Helicobacter pylori* strains in Isfahan, Iran. *Iran J Basic Med Sci* 2008;11:174–182.
- Ndip RN, Malange Takang AE, Ojongokpoko JE, et al. *Helicobacter pylori* isolates recovered from gastric biopsies of patients with gastro-duodenal pathologies in Cameroon: current status of antibiogram. *Tropic Med Int Health* 2008;13:848–854.
- Ahmad N, Zakaria WR, Abdullah SA, et al. Characterization of clarithromycin resistance in Malaysian isolates of *Helicobacter pylori*. *World J Gastroenterol* 2009;15:3161–3165.
- Andrzejewska E, Szkaradkiewicz A, Karpinski T. Antimicrobial resistance of *Helicobacter pylori* clinical strains in the last 10 years. *Polish J Microbiol* 2009;58:301–305.
- Horiki N, Omata F, Uemura M, et al. Annual change of primary resistance to clarithromycin among *Helicobacter pylori* isolates from 1996 through 2008 in Japan. *Helicobacter* 2009;14:86–90.
- Kuo CH, Hu HM, Kuo FC, et al. Efficacy of levofloxacin-based rescue therapy for *Helicobacter pylori* infection after standard triple therapy: a randomized controlled trial. *J Antimicrob Chemother* 2009;63:1017–1024.
- Singh V, Mishra S, Maurya P, et al. Drug resistance pattern and clonality in *H. pylori* strains. *J Infect Dev Ctries* 2009;3:130–136.
- Tanuma M, Rimbara E, Noguchi N, et al. Analysis of clarithromycin resistance and CagA status in *Helicobacter pylori* by use of feces from children in Thailand. *J Clin Microbiol* 2009;47:4144–4145.
- Tonkic A, Tonkic M, Brnic D. Increasing prevalence of primary clarithromycin resistance in *Helicobacter pylori* strains in Split, Croatia. *J Chemother* 2009;21:5984–5989.
- Woo HY, Park DI, Park H, et al. Dual-priming oligonucleotide-based multiplex PCR for the detection of *Helicobacter pylori* and determination of clarithromycin resistance with gastric biopsy specimens. *Helicobacter* 2009;14:224–228.
- Wueppenhorst N, Stueger HP, Kist M, et al. Identification and molecular characterization of triple- and quadruple-resistant *Helicobacter pylori* clinical isolates in Germany. *J Antimicrob Chemother* 2009;63:6484–6653.
- Xuan SH, Zhou YG, Shao B, et al. Enzymic colorimetry-based DNA chip: a rapid and accurate assay for detecting mutations for clarithromycin resistance in the 23S rRNA gene of *Helicobacter pylori*. *J Med Microbiol* 2009;58(Pt 11). 14434–14438.
- Agudo S, Perez-Perez G, Alarcon T, et al. High prevalence of clarithromycin-resistant *Helicobacter pylori* strains and risk factors associated with resistance in Madrid, Spain. *J Clin Microbiol* 2010;48. 37034–3707.
- Bago J, Majstorovic K, Belosic-Halle Z, et al. Antimicrobial resistance of *H. pylori* to the outcome of 10-days vs. 7-days moxifloxacin based therapy for the eradication: a randomized controlled trial. *Ann Clin Microbiol Antimicrob* 2010;9. 134–118.
- Boyanova L, Nikolov R, Gergova G, et al. Two-decade trends in primary *Helicobacter pylori* resistance to antibiotics in Bulgaria. *Diagn Microbiol Infect Dis* 2010;67:319–326.
- Farshad S, Alborzi A, Japoni A, et al. Antimicrobial susceptibility of *Helicobacter pylori* strains isolated from patients in Shiraz, Southern Iran. *World J Gastroenterol* 2010;16:5746–5751.
- Gao W, Cheng H, Hu F, et al. The evolution of *Helicobacter pylori* antibiotics resistance over 10 years in Beijing, China. *Helicobacter* 2010;15:460–466.
- Haghi Tomatari F, Mohabbati Mobarez A, Amini M, et al. *Helicobacter pylori* resistance to metronidazole and clarithromycin in dyspeptic patients in Iran. *Iran Red Crescent Med J* 2010;12:409–412.
- Hwang TJ, Kim N, Kim HB, et al. Change in antibiotic resistance of *Helicobacter pylori* strains and the effect of A2143G point mutation of 23S rRNA on the eradication of *H. pylori* in a single center of Korea. *J Clin Gastroenterol* 2010;44:536–543.
- Lins AK, Lima RA, Magalhaes M. Clarithromycin-resistant *Helicobacter pylori* in Recife, Brazil, directly identified from gastric biopsies by polymerase chain reaction. *Arq Gastroenterol* 2010;47:379–382.
- Liou JM, Lin JT, Chang CY, et al. Levofloxacin-based and clarithromycin-based triple therapies as first-line and second-line treatments for *Helicobacter pylori* infection: a randomised comparative trial with crossover design. *Gut* 2010;59:572–578.
- O'Connor A, Taneike I, Nami A, et al. *Helicobacter pylori* resistance to metronidazole and clarithromycin in Ireland. *Eur J Gastroenterol Hepatol* 2010;22:1123–1127.
- Raymond J, Lamarque D, Kalach N, et al. High level of antimicrobial resistance in French *Helicobacter pylori* isolates. *Helicobacter* 2010;15:21–27.
- Romano M, Cuomo A, Gravina AG, et al. Empirical levofloxacin-containing versus clarithromycin-containing sequential therapy for *Helicobacter pylori* eradication: a randomised trial. *Gut* 2010;59:1465–1470.
- Siavoshi F, Saniee P, Latifi-Navid S, et al. Increase in resistance rates of *H. pylori* isolates to metronidazole and tetracycline—comparison of three 3-year studies. *Arch Iran Med* 2010;13:177–187.
- Sirimontaporn N, Thong-Ngam D, Tumwasorn S, et al. Ten-day sequential therapy of *Helicobacter pylori* infection in Thailand. *Am J Gastroenterol* 2010;105:1071–1075.
- Sun QJ, Liang X, Zheng Q, et al. Resistance of *Helicobacter pylori* to antibiotics from 2000 to 2009 in Shanghai. *World J Gastroenterol* 2010;16:5118–5121.
- Vecsei A, Innerhofer A, Binder C, et al. Stool polymerase chain reaction for *Helicobacter pylori* detection and

- clarithromycin susceptibility testing in children. *Clin Gastroenterol Hepatol* 2010;8:309–312.
30. Wang LH, Cheng H, Hu FL, et al. Distribution of *gyrA* mutations in fluoroquinolone-resistant *Helicobacter pylori* strains. *World J Gastroenterol* 2010;16:2272–2277.
  31. Wu DC, Hsu PI, Wu JY, et al. Sequential and concomitant therapy with four drugs is equally effective for eradication of *H pylori* infection. *Clin Gastroenterol Hepatol* 2010;8:36–41.
  32. Yakoob J, Abid S, Abbas Z, et al. Antibiotic susceptibility patterns of *Helicobacter pylori* and triple therapy in a high-prevalence area. *Br J Biomed Sci* 2010;67:197–201.
  33. Zevit N, Levy I, Shmueli H, et al. Antibiotic resistance of *Helicobacter pylori* in Israeli children. *Scand J Gastroenterol* 2010;45:550–555.
  34. Zheng Q, Chen WJ, Lu H, et al. Comparison of the efficacy of triple versus quadruple therapy on the eradication of *Helicobacter pylori* and antibiotic resistance. *J Digest Dis* 2010;11:313–318.
  35. Abadi AT, Taghvaei T, Mobarez AM, et al. Frequency of antibiotic resistance in *Helicobacter pylori* strains isolated from the northern population of Iran. *J Microbiol* 2011;49:987–993.
  36. Agudo S, Perez-Perez G, Alarcon T, et al. Rapid detection of clarithromycin resistant *Helicobacter pylori* strains in Spanish patients by polymerase chain reaction-restriction fragment length polymorphism. *Rev Esp Quimioter* 2011;24:32–36.
  37. Bontems P, Kalach N, Oderda G, et al. Sequential therapy versus tailored triple therapies for *Helicobacter pylori* infection in children. *J Pediatr Gastroenterol Nutr* 2011;53:646–650.
  38. De Francesco V, Giorgio F, Ierardi E, Zotti M, Neri M, Milano A, et al. Primary clarithromycin resistance in *Helicobacter pylori*: the Multicentric Italian Clarithromycin Resistance Observational (MICRO) study. *J Gastrointest Liver Dis* 2011;20:235–239.
  39. Goh KL, Navaratnam P. High *Helicobacter pylori* resistance to metronidazole but zero or low resistance to clarithromycin, levofloxacin, and other antibiotics in Malaysia. *Helicobacter* 2011;16:241–245.
  40. Karczewska E, Wojtas-Bonior I, Sito E, et al. Primary and secondary clarithromycin, metronidazole, amoxicillin and levofloxacin resistance to *Helicobacter pylori* in southern Poland. *Pharmacol Rep* 2011;63:799–807.
  41. Lehours P, Siffre E, Megraud F. DPO multiplex PCR as an alternative to culture and susceptibility testing to detect *Helicobacter pylori* and its resistance to clarithromycin. *BMC Gastroenterol* 2011;11:112.
  42. Liou JM, Chen CC, Chen MJ, et al. Empirical modified sequential therapy containing levofloxacin and high-dose esomeprazole in second-line therapy for *Helicobacter pylori* infection: a multicentre clinical trial. *J Antimicrob Chemother* 2011;66:1847–1852.
  43. Liu G, Xu X, He L, et al. Primary antibiotic resistance of *Helicobacter pylori* isolated from Beijing children. *Helicobacter* 2011;16:356–362.
  44. Miendje Deyi VY, Bontems P, Vanderpas J, et al. Multi-center survey of routine determinations of resistance of *Helicobacter pylori* to antimicrobials over the last 20 years (1990 to 2009) in Belgium. *J Clin Microbiol* 2011;49:2200–2209.
  45. Vecsei A, Innerhofer A, Graf U, et al. *Helicobacter pylori* eradication rates in children upon susceptibility testing based on noninvasive stool polymerase chain reaction versus gastric tissue culture. *J Pediatr Gastroenterol Nutr* 2011;53:65–70.
  46. Vilaichone RK, Mahachai V, Tumwasorn S, et al. CagA genotype and metronidazole resistant strain of *Helicobacter pylori* in functional dyspepsia in Thailand. *J Gastroenterol Hepatol* 2011;26(Suppl 3):46–48.
  47. Yakoob J, Jafri W, Abbas Z, et al. Risk factors associated with *Helicobacter pylori* infection treatment failure in a high prevalence area. *Epidemiol Infect* 2011;139:581–590.
  48. Chung JW, Jung YK, Kim YJ, et al. Ten-day sequential versus triple therapy for *Helicobacter pylori* eradication: a prospective, open-label, randomized trial. *J Gastroenterol Hepatol* 2012;27:1675–1680.
  49. Chung JW, Lee GH, Jeong JY, et al. Resistance of *Helicobacter pylori* strains to antibiotics in Korea with a focus on fluoroquinolone resistance. *J Gastroenterol Hepatol* 2012;27:493–497.
  50. Cuadrado-Lavin A, Salcines-Caviedes JR, Carrascosa MF, et al. Antimicrobial susceptibility of *Helicobacter pylori* to six antibiotics currently used in Spain. *J Antimicrob Chemother* 2012;67:170–173.
  51. Federico A, Nardone G, Gravina AG, et al. Efficacy of 5-day levofloxacin-containing concomitant therapy in eradication of *Helicobacter pylori* infection. *Gastroenterology* 2012;143:55–61.
  52. Hansomburana P, Anantapanpong S, Sirinthornpunya S, et al. Prevalence of single nucleotide mutation in clarithromycin resistant gene of *Helicobacter pylori*: a 32-months prospective study by using hybridization real time polymerase chain reaction. *J Med Assoc Thailand* 2012;95(Suppl 3):S28–S35.
  53. Huang YK, Wu MC, Wang SS, et al. Lansoprazole-based sequential and concomitant therapy for the first-line *Helicobacter pylori* eradication. *J Digest Dis* 2012;13:232–238.
  54. Karczewska E, Klesiewicz K, Skiba I, et al. Variability in prevalence of *Helicobacter pylori* strains resistant to clarithromycin and levofloxacin in southern Poland. *Gastroenterol Res Pract* 2012; article ID418010.
  55. Khan A, Farooqui A, Manzoor H, et al. Antibiotic resistance and *cagA* gene correlation: a looming crisis of *Helicobacter pylori*. *World J Gastroenterol* 2012;18(18):2245–2452.
  56. McNulty CA, Lasseter G, Shaw I, et al. Is *Helicobacter pylori* antibiotic resistance surveillance needed and how can it be delivered? *Aliment Pharmacol Ther* 2012;35:1221–1230.
  57. Milani M, Ghotaslou R, Akhi MT, et al. The status of antimicrobial resistance of *Helicobacter pylori* in Eastern Azerbaijan, Iran: comparative study according to demographics. *J Infect Chemother* 2012;18:848–852.
  58. Molina-Infante J, Pazos-Pacheco C, Vinagre-Rodriguez G, et al. Nonbismuth quadruple (concomitant)

- therapy: empirical and tailored efficacy versus standard triple therapy for clarithromycin-susceptible *Helicobacter pylori* and versus sequential therapy for clarithromycin-resistant strains. *Helicobacter* 2012;17:269–276.
59. Rajper S, Khan E, Ahmad Z, et al. Macrolide and fluoroquinolone resistance in *Helicobacter pylori* isolates: an experience at a tertiary care centre in Pakistan. *J Pak Med Assoc* 2012;62:1140–1144.
  60. Saracino IM, Zullo A, Holton J, et al. High prevalence of primary antibiotic resistance in *Helicobacter pylori* isolates in Italy. *J Gastrointest Liver Dis* 2012;21:363–365.
  61. Talebi Bezin Abadi A, Ghasemzadeh A, Taghvaei T, et al. Primary resistance of *Helicobacter pylori* to levofloxacin and moxifloxacin in Iran. *Intern Emerg Med* 2012;7:447–452.
  62. Tay CY, Windsor HM, Thirriot F, et al. *Helicobacter pylori* eradication in Western Australia using novel quadruple therapy combinations. *Aliment Pharmacol Ther* 2012;36:1076–1083.
  63. Tonkic A, Tonkic M, Brnic D, et al. Time trends of primary antibiotic resistance of *Helicobacter pylori* isolates in Southern Croatia. *J Chemother* 2012;24:182–184.
  64. Zhou YQ, Xu L, Wang BF, et al. Modified sequential therapy regimen versus conventional triple therapy for *Helicobacter Pylori* eradication in duodenal ulcer patients in China: a multicenter clinical comparative study. *Gastroenterol Res Pract* 2012;2012:article ID405425.
  65. An B, Moon BS, Kim H, et al. Antibiotic resistance in *Helicobacter pylori* strains and its effect on *H. pylori* eradication rates in a single center in Korea. *Ann Lab Med* 2013;33:415–419.
  66. Binh TT, Shiota S, Nguyen LT, et al. The incidence of primary antibiotic resistance of *Helicobacter pylori* in Vietnam. *J Clin Gastroenterol* 2013;47:233–238.
  67. Cosme A, Montes M, Martos M, et al. Usefulness of antimicrobial susceptibility in the eradication of *Helicobacter pylori*. *Clin Microbiol Infect* 2013;19:379–383.
  68. Georgopoulos SD, Xirouchakis E, Martinez-Gonzalez B, et al. Clinical evaluation of a ten-day regimen with esomeprazole, metronidazole, amoxicillin, and clarithromycin for the eradication of *Helicobacter pylori* in a high clarithromycin resistance area. *Helicobacter* 2013;18:459–467.
  69. Hsiang J, Selvaratnam S, Taylor S, et al. Increasing primary antibiotic resistance and ethnic differences in eradication rates of *Helicobacter pylori* infection in New Zealand—a new look at an old enemy. *N Z Med J* 2013;126(1384):64–76.
  70. Khademi F, Faghri J, Poursina F, et al. Resistance pattern of *Helicobacter pylori* strains to clarithromycin, metronidazole, and amoxicillin in Isfahan, Iran. *J Res Med Sci* 2013;18:1056–1060.
  71. Kupcinskas L, Rasmussen L, Jonaitis L, et al. Evolution of *Helicobacter pylori* susceptibility to antibiotics during a 10-year period in Lithuania. *APMIS* 2013;121:431–436.
  72. Lee JW, Kim N, Kim JM, et al. Prevalence of primary and secondary antimicrobial resistance of *Helicobacter pylori* in Korea from 2003 through 2012. *Helicobacter* 2013;18:206–214.
  73. Liang X, Xu X, Zheng Q, et al. Efficacy of bismuth-containing quadruple therapies for clarithromycin-, metronidazole-, and fluoroquinolone-resistant *Helicobacter pylori* infections in a prospective study. *Clin Gastroenterol Hepatol* 2013;11:802–807.
  74. Liao J, Zheng Q, Liang X, et al. Effect of fluoroquinolone resistance on 14-day levofloxacin triple and triple plus bismuth quadruple therapy. *Helicobacter* 2013;18:373–377.
  75. Liou JM, Chen CC, Chen MJ, et al. Sequential versus triple therapy for the first-line treatment of *Helicobacter pylori*: a multicentre, open-label, randomised trial. *Lancet* 2013;381(9862):205–213.
  76. Loffeld RJ, Werdmuller BF. Changes in antibiotic susceptibility of *Helicobacter pylori* in the course of eight years in the Zaanstreek Region in The Netherlands. *Gastroenterol Res Pract* 2013;2013:article ID625937.
  77. Megraud F, Coenen S, Versporten A, et al. *Helicobacter pylori* resistance to antibiotics in Europe and its relationship to antibiotic consumption. *Gut* 2013;62:34–42.
  78. Molina-Infante J, Romano M, Fernandez-Bermejo M, et al. Optimized nonbismuth quadruple therapies cure most patients with *Helicobacter pylori* infection in populations with high rates of antibiotic resistance. *Gastroenterology* 2013;145:121–128.
  79. Morse AL, Goodman KJ, Munday R, et al. A randomized controlled trial comparing sequential with triple therapy for *Helicobacter pylori* in an Aboriginal community in the Canadian North. *Can J Gastroenterol* 2013;27:701–706.
  80. Murakami K, Furuta T, Ando T, et al. Multi-center randomized controlled study to establish the standard third-line regimen for *Helicobacter pylori* eradication in Japan. *J Gastroenterol* 2013;48(10):1128–1135.
  81. O'Connor A, Taneike I, Nami A, et al. *Helicobacter pylori* resistance rates for levofloxacin, tetracycline and rifabutin among Irish isolates at a reference centre. *Irish J Med Sci* 2013;182:693–695.
  82. Ogata SK, Godoy AP, da Silva Patricio FR, et al. High *Helicobacter pylori* resistance to metronidazole and clarithromycin in Brazilian children and adolescents. *J Pediatr Gastroenterol Nutr* 2013;56:645–648.
  83. Sadeghifard N, Seidnazari T, Ghafourian S, et al. Survey in Iran of clarithromycin resistance in *Helicobacter pylori* isolates by PCR-RFLP. *Southeast Asian J Trop Med Public Health* 2013;44:89–95.
  84. Seck A, Burucoa C, Dia D, et al. Primary antibiotic resistance and associated mechanisms in *Helicobacter pylori* isolates from Senegalese patients. *Ann Clin Microbiol Antimicrob* 2013;12:3.
  85. Su P, Li Y, Li H, Zhang J, et al. Antibiotic resistance of *Helicobacter pylori* isolated in the Southeast coastal region of China. *Helicobacter* 2013;18:274–279.
  86. Trespalacios AA, Otero W, Caminos JE, et al. Phenotypic and genotypic analysis of clarithromycin-resistant *Helicobacter pylori* from Bogota DC, Colombia. *J Microbiol* 2013;51:448–452.
  87. Vekens K, Vandebosch S, De Bel A, et al. Primary antimicrobial resistance of *Helicobacter pylori* in Belgium. *Acta Clin Belg* 2013;68:183–187.



88. Vilaichone RK, Yamaoka Y, Shiota S, et al. Antibiotics resistance rate of *Helicobacter pylori* in Bhutan. *World J Gastroenterol* 2013;19:5508–5512.
89. Wueppenhorst N, Stueger HP, Kist M, et al. High secondary resistance to quinolones in German *Helicobacter pylori* clinical isolates. *J Antimicrob Chemother* 2013;68:1562–1566.
90. Yula E, Nagiyev T, Kaya OA, et al. Detection of primary clarithromycin resistance of *Helicobacter pylori* and association between *cagA* (+) status and clinical outcome. *Folia Microbiol* 2013;58:141–146.
91. Zendedel A, Moradimoghadam F, Almasi V, et al. Antibiotic resistance of *Helicobacter pylori* in Mashhad, Iran. *J Pak Med Assoc* 2013;63:336–339.
92. Boyanova L, Davidkov L, Gergova G, et al. *Helicobacter pylori* susceptibility to fosfomycin, rifampin, and 5 usual antibiotics for *H. pylori* eradication. *Diagn Microbiol Infect Dis* 2014;79:358–361.
93. Karamanolis GP, Daikos GL, Xouris D, et al. The evolution of *Helicobacter pylori* antibiotics resistance over 10 years in Greece. *Digestion* 2014;90:229–231.
94. Keshavarz Azizi Raftar S, Moniri R, Saffari M, et al. *Helicobacter pylori* resistance to ciprofloxacin in Iran. *Int J Antimicrob Agents* 2014;43:573–574.
95. Kutluk G, Tutar E, Bayrak A, et al. Sequential therapy versus standard triple therapy for *Helicobacter pylori* eradication in children: any advantage in clarithromycin-resistant strains? *Eur J Gastroenterol Hepatol* 2014;26:1202–1208.
96. Lee JY, Kim N, Kim MS, et al. Factors affecting first-line triple therapy of *Helicobacter pylori* including CYP2C19 genotype and antibiotic resistance. *Digest Dis Sci* 2014;59:1235–1243.
97. Martos M, Bujanda L, Salicio Y, et al. Clarithromycin for first-line treatment of *Helicobacter pylori* infection after culture in high-resistance regions. *Eur J Gastroenterol Hepatol* 2014;26:1380–1384.
98. Ogata SK, Gales AC, Kawakami E. Antimicrobial susceptibility testing for *Helicobacter pylori* isolates from Brazilian children and adolescents: comparing agar dilution, E-test, and disk diffusion. *Braz J Microbiol* 2014;45:1439–1448.
99. Park CS, Lee SM, Park CH, et al. Pretreatment antimicrobial susceptibility-guided vs. clarithromycin-based triple therapy for *Helicobacter pylori* eradication in a region with high rates of multiple drug resistance. *Am J Gastroenterol* 2014;109:1595–1602.
100. Peretz A, Paritsky M, Nasser O, et al. Resistance of *Helicobacter pylori* to tetracycline, amoxicillin, clarithromycin and metronidazole in Israeli children and adults. *J Antibiotics* 2014; 67L555–L557.
101. Picoli SU, Mazzoleni LE, Fernandez H, et al. Resistance to amoxicillin, clarithromycin and ciprofloxacin of *Helicobacter pylori* isolated from Southern Brazil patients. *Rev Inst Med Trop Sao Paulo* 2014;56:197–200.
102. Selgrad M, Tammer I, Langner C, et al. Different antibiotic susceptibility between antrum and corpus of the stomach, a possible reason for treatment failure of *Helicobacter pylori* infection. *World J Gastroenterol* 2014;20:16245–16251.
103. Wuppenhorst N, Draeger S, Stuger HP, et al. Prospective multicentre study on antimicrobial resistance of *Helicobacter pylori* in Germany. *J Antimicrob Chemother* 2014;69:3127–3133.
104. Zhao LJ, Huang YQ, Chen BP, et al. *Helicobacter pylori* isolates from ethnic minority patients in Guangxi: resistance rates, mechanisms, and genotype. *World J Gastroenterol* 2014;20:4761–4770.
105. Zhou L, Zhang J, Chen M, et al. A comparative study of sequential therapy and standard triple therapy for *Helicobacter pylori* infection: a randomized multicenter trial. *Am J Gastroenterol* 2014;109:535–541.
106. Alsohaibani F, Al Ashgar H, Al Kahtani K, et al. Prospective trial in Saudi Arabia comparing the 14-day standard triple therapy with the 10-day sequential therapy for treatment of *Helicobacter pylori* infection. *Saudi J Gastroenterol* 2015;21:220–225.
107. Bai P, Zhou LY, Xiao XM, et al. Susceptibility of *Helicobacter pylori* to antibiotics in Chinese patients. *J Digest Dis* 2015;16:464–470.
108. Boltin D, Ben-Zvi H, Perets TT, et al. Trends in secondary antibiotic resistance of *Helicobacter pylori* from 2007 to 2014: has the tide turned? *J Clin Microbiol* 2015;53:522–527.
109. Boyanova L, Evstatiev I, Gergova G, et al. Linezolid susceptibility in *Helicobacter pylori*, including strains with multidrug resistance. *Int J Antimicrob Agents* 2015;46:703–706.
110. Caliskan R, Tokman HB, Erzin Y, et al. Antimicrobial resistance of *Helicobacter pylori* strains to five antibiotics, including levofloxacin, in Northwestern Turkey. *Rev Soc Bras Med Trop* 2015;48:278–284.
111. Cao Z, Chen Q, Zhang W, et al. Fourteen-day optimized levofloxacin-based therapy versus classical quadruple therapy for *Helicobacter pylori* treatment failures: a randomized clinical trial. *Scand J Gastroenterol* 2015;50:1185–1190.
112. Chen KY, Lin TJ, Lin CL, et al. Hybrid vs sequential therapy for eradication of *Helicobacter pylori* in Taiwan: a prospective randomized trial. *World J Gastroenterol* 2015;21:10435–10442.
113. Cheng A, Sheng WH, Liou JM, et al. Comparative in vitro antimicrobial susceptibility and synergistic activity of antimicrobial combinations against *Helicobacter pylori* isolates in Taiwan. *J Microbiol Immunol Infect* 2015;48:72–79.
114. Dong F, Ji D, Huang R, et al. Multiple genetic analysis system-based antibiotic susceptibility testing in *Helicobacter pylori* and high eradication rate with phenotypic resistance-guided quadruple therapy. *Medicine* 2015;94(47):e2056.
115. Hsu PI, Kao SS, Wu DC, et al. A randomized controlled study comparing reverse hybrid therapy and standard triple therapy for *Helicobacter pylori* infection. *Medicine* 2015;94(48):e2104.
116. Kalach N, Gosset P, Dehecq E, et al. Usefulness of gastric biopsy-based real-time polymerase chain reaction for the diagnosis of *Helicobacter pylori* infection in children. *J Pediatr Gastroenterol Nutr* 2015;61:307–312.

117. Keshavarz Azizi Raftar S, Moniri R, Saffari M, et al. The *Helicobacter pylori* resistance rate to clarithromycin in Iran. *Microb Drug Resist* 2015;21:69–73.
118. Liou JM, Chang CY, Chen MJ, et al. The primary resistance of *Helicobacter pylori* in Taiwan after the national policy to restrict antibiotic consumption and its relation to virulence factors—a nationwide study. *PLoS One* 2015;10(5):e0124199.
119. Liu Q, Qi D, Kang J, et al. Efficacy of real-time PCR-based detection of *Helicobacter pylori* infection and genotypic resistance-guided quadruple therapy as the first-line treatment for functional dyspepsia with *Helicobacter pylori* infection. *Eur J Gastroenterol Hepatol* 2015;27:221–225.
120. Navarro-Jarabo JM, Fernandez-Sanchez F, Fernandez-Moreno N, et al. Prevalence of primary resistance of *Helicobacter pylori* to clarithromycin and levofloxacin in southern Spain. *Digestion* 2015;92:78–82.
121. Ontsira Ngoyi EN, Atipo Ibara BI, Moyen R, et al. Molecular detection of *Helicobacter pylori* and its antimicrobial resistance in Brazzaville, Congo. *Helicobacter* 2015;20:316–320.
122. Peretz A, Paritsky M, Dinisman-Zavulunov E, et al. Susceptibility of *Helicobacter pylori* to levofloxacin and rifampicin in Israel. *Microb Drug Resist* 2015;21:448–451.
123. Phan TN, Santona A, Tran VH, et al. High rate of levofloxacin resistance in a background of clarithromycin- and metronidazole-resistant *Helicobacter pylori* in Vietnam. *Int J Antimicrob Agents* 2015;45:244–248.
124. Prapitpaiboon H, Mahachai V, Vilaichone RK. High efficacy of levofloxacin-dexlansoprazole-based quadruple therapy as a first line treatment for *Helicobacter pylori* eradication in Thailand. *Asian Pac J Cancer Prev* 2015;16:4353–4356.
125. Shiota S, Reddy R, Alsarraj A, et al. Antibiotic resistance of *Helicobacter pylori* among male United States Veterans. *Clin Gastroenterol Hepatol* 2015;13:1616–1624.
126. Shokrzadeh L, Alebouyeh M, Mirzaei T, et al. Prevalence of multiple drug-resistant *Helicobacter pylori* strains among patients with different gastric disorders in Iran. *Microb Drug Resist* 2015;21:105–110.
127. Tai WC, Liang CM, Lee CH, et al. Seven-day nonbismuth containing quadruple therapy could achieve a grade “A” success rate for first-line *Helicobacter pylori* eradication. *BioMed Res Int* 2015;2015:article1 D623732.
128. Tong YF, Lv J, Ying LY, et al. Seven-day triple therapy is a better choice for *Helicobacter pylori* eradication in regions with low antibiotic resistance. *World J Gastroenterol* 2015;21:13073–13079.
129. Tongtawee T, Dechsukhum C, Matrakool L, et al. High prevalence of *Helicobacter pylori* resistance to clarithromycin: a hospital-based cross-sectional study in Nakhon Ratchasima Province, Northeast of Thailand. *Asian Pa J Cancer Prev* 2015;16:8281–8285.
130. Tsay FW, Wu DC, Kao SS, et al. Reverse sequential therapy achieves a similar eradication rate as standard sequential therapy for *Helicobacter pylori* eradication: a randomized controlled trial. *Helicobacter* 2015;20:71–77.
131. Wu IT, Chuah SK, Lee CH, et al. Five-year sequential changes in secondary antibiotic resistance of *Helicobacter pylori* in Taiwan. *World J Gastroenterol* 2015;21:10669–10674.
132. Yang JC, Lin CJ, Wang HL, et al. High-dose dual therapy is superior to standard first-line or rescue therapy for *Helicobacter pylori* infection. *Clin Gastroenterol Hepatol* 2015;13:895–905.
133. Zhang W, Chen Q, Liang X, et al. Bismuth, lansoprazole, amoxicillin and metronidazole or clarithromycin as first-line *Helicobacter pylori* therapy. *Gut* 2015;64:1715–17120.
134. Zhang YX, Zhou LY, Song ZQ, et al. Primary antibiotic resistance of *Helicobacter pylori* strains isolated from patients with dyspeptic symptoms in Beijing: a prospective serial study. *World J Gastroenterol* 2015;21:2786–2792.
135. Aftab H, Miftahussurur M, Subsomwong P, et al. *Helicobacter pylori* antibiotic susceptibility patterns in Bangladesh: emerging levofloxacin resistance. *J Infect Dev Ctries* 2016;10:245–253.
136. Ang TL, Fock KM, Ang D, et al. The changing profile of *Helicobacter pylori* antibiotic resistance in Singapore: a 15-year study. *Helicobacter* 2016;21:261–265.
137. Baradaran Moghaddam A, Alebouyeh M, Farzi N, et al. Sensitivity to nitazoxanide among metronidazole resistant *Helicobacter pylori* strains in patients with gastritis. *Med J Islam Repub Iran* 2016;30:405.
138. Bouihat N, Burucoa C, Benkirane A, et al. *Helicobacter pylori* primary antibiotic resistance in 2015 in Morocco: a phenotypic and genotypic prospective and multicenter study. *Microb Drug Resist* 2017;23:727–732.
139. Brennan DE, Omorogbe J, Hussey M, et al. Molecular detection of *Helicobacter pylori* antibiotic resistance in stool vs biopsy samples. *World J Gastroenterol* 2016;22:9214–9221.
140. Chen Q, Zhang W, Fu Q, et al. Rescue therapy for *Helicobacter pylori* eradication: a randomized non-inferiority trial of amoxicillin or tetracycline in bismuth quadruple therapy. *The Am J Gastroenterol* 2016;111:1736–1742.
141. Cosme A, Lizasoan J, Montes M, et al. antimicrobial susceptibility-guided therapy versus empirical concomitant therapy for eradication of *Helicobacter pylori* in a region with high rate of clarithromycin resistance. *Helicobacter* 2016;21:29–34.
142. Ducournau A, Benejat L, Sifre E, et al. *Helicobacter pylori* resistance to antibiotics in 2014 in France detected by phenotypic and genotypic methods. *Clin Microbiol Infect* 2016;22:715–718.
143. Georgopoulos SD, Xirouchakis E, Martinez-Gonzales B, et al. Randomized clinical trial comparing ten day concomitant and sequential therapies for *Helicobacter pylori* eradication in a high clarithromycin resistance area. *Eur J Intern Med* 2016;32:84–90.
144. Ghaith D, Elzahry M, Mostafa G, et al. Mutations affecting domain V of the 23S rRNA gene in *Helicobacter pylori* from Cairo, Egypt. *Journal of chemotherapy* 2016;28(5):367–370.
145. Goudarzi M, Heidary M, Azad M, et al. Evaluation of antimicrobial susceptibility and integron carriage in

- Helicobacter pylori* isolates from patients. Gastroenterol Hepatol Bed Bench 2016;9(Suppl1):S47–S52.
146. Goudarzi M, Seyedjavadi SS, Fazeli M, et al. Identification of a novel cassette array in integronbearing *Helicobacter Pylori* strains isolated from Iranian patients. Asian Pac J Cancer Prev 2016;17:3309–3315.
  147. Han R, Lu H, Jiang M-W, et al. Multicenter study of antibiotic resistance profile of *H. pylori* and distribution of CYP2C19 gene polymorphism in rural population of Chongqing, China. Gastroenterol Res Pract 2016;2016: article ID8547686.
  148. Hong J, Shu X, Liu D, et al. Antibiotic resistance and CYP2C19 polymorphisms affect the efficacy of concomitant therapies for *Helicobacter pylori* infection: an open-label, randomized, single-centre clinical trial. J Antimicrob Chemother 2016;71:2280–2285.
  149. Iwanczak BM, Borys-Iwanicka A, Biernat M, et al. assessment of sequential and standard triple therapy in treatment of *Helicobacter pylori* infection in children dependent on bacteria sensitivity to antibiotics. Adv Clin Exp Med 2016;25:701–708.
  150. Ji Z, Han F, Meng F, Tu M, et al. The association of age and antibiotic resistance of *Helicobacter Pylori*: a study in Jiaying City, Zhejiang Province, China. Medicine 2016; 95(8):e2831.
  151. Khashei R, Dara M, Bazargani A, et al. High rate of A2142G point mutation associated with clarithromycin resistance among Iranian *Helicobacter pylori* clinical isolates. APMIS 2016;124:787–793.
  152. Kuo CH, Liu CJ, Yang CC, et al. A rapid and accurate method to evaluate *Helicobacter pylori* infection, clarithromycin resistance, and CYP2C19 genotypes simultaneously from gastric juice. Medicine 2016;95(21): e3458.
  153. Liou JM, Chen CC, Chang C, et al. Sequential therapy for 10 days versus triple therapy for 14 days in the eradication of *Helicobacter pylori* in the community and hospital populations: a randomised trial. Gut 2016; 65:1784–1792.
  154. Liou JM, Fang YJ, Chen CC, et al. Concomitant, bismuth quadruple, and 14-day triple therapy in the first-line treatment of *Helicobacter pylori*: a multicentre, open-label, randomised trial. Lancet 2016;388(10058): 2355–2365.
  155. Martins GM, Sanches BS, Moretzsohn LD, et al. Molecular detection of clarithromycin and fluoroquinolones resistance in *Helicobacter pylori* infection, directly applied to gastric biopsies, in an urban Brazilian population. Arq Gastroenterol 2016;53:113–117.
  156. Miftahussurur M, Syam AF, Nusi IA, et al. Surveillance of *Helicobacter pylori* antibiotic susceptibility in Indonesia: different resistance types among regions and with novel genetic mutations. PLoS One 2016;11:e0166199.
  157. Park JY, Dunbar KB, Mitui M, et al. *Helicobacter pylori* clarithromycin resistance and treatment failure are common in the USA. Digest Dis Sci 2016;61:2373–2380.
  158. Phiphatpatthamaamphan K, Vilaichone RK, Sramolpiwat S, et al. Effect of IL-1 polymorphisms, CYP2C19 genotype and antibiotic resistance on *Helicobacter pylori* eradication comparing between 10-day sequential therapy and 14-day standard triple therapy with four-times-daily-dosing of amoxicillin in Thailand: a prospective randomized study. Asian Pac J Cancer Prev 2016;17:1903–1907.
  159. Quek C, Pham ST, Tran KT, et al. Antimicrobial susceptibility and clarithromycin resistance patterns of *Helicobacter pylori* clinical isolates in Vietnam. F1000Res 2016;5:671.
  160. Ramzy I, Elgarem H, Hamza I, et al. Genetic mutations affecting the first line eradication therapy of *Helicobacter pylori*-infected Egyptian patients. Rev Inst Med Trop Sao Paulo 2016;58:88.
  161. Sanches BS, Martins GM, Lima K, et al. Detection of *Helicobacter pylori* resistance to clarithromycin and fluoroquinolones in Brazil: a national survey. World J Gastroenterol 2016;22:7587–7594.
  162. Schwarzer A, Bontems P, Urruzuno P, et al. Sequential therapy for *Helicobacter pylori* infection in treatment-naive children. Helicobacter 2016;21:106–113.
  163. Song Z, Suo B, Zhang L, et al. Rabeprazole, minocycline, amoxicillin, and bismuth as first-line and second-line regimens for *Helicobacter pylori* eradication. Helicobacter 2016;21:462–470.
  164. Song Z, Zhou L, Zhang J, et al. Levofloxacin, bismuth, amoxicillin and esomeprazole as second-line *Helicobacter pylori* therapy after failure of non-bismuth quadruple therapy. Digest Liver Disease 2016;48: 506–511.
  165. Song Z, Zhou L, Zhang J, et al. Hybrid therapy as first-line regimen for *Helicobacter pylori* eradication in populations with high antibiotic resistance rates. Helicobacter 2016;21:382–388.
  166. Vannarath S, Vilaichone RK, Rasachak B, et al. Antibiotic resistant pattern of *Helicobacter Pylori* infection based on molecular tests in Laos. Asian Pac J Cancer Prev 2016;17:285–287.
  167. Vilaichone RK, Ratanachu-Ek T, Gamnarai P, et al. extremely high prevalence of metronidazole-resistant *Helicobacter pylori* strains in mountain people (Karen and Hmong) in Thailand. Am J Trop Med Hyg 2016; 94:717–720.
  168. Wu DC, Kuo CH, Tsay FW, et al. A pilot randomized controlled study of dexlansoprazole MR-based triple therapy for *Helicobacter pylori* infection. Medicine 2016; 95:e2698.
  169. Zhou L, Zhang J, Song Z, et al. Tailored versus triple plus bismuth or concomitant therapy as initial *Helicobacter pylori* treatment: a randomized trial. Helicobacter 2016; 21:91–99.
  170. Zollner-Schwetz I, Leitner E, Plieschegger W, et al. Primary resistance of *Helicobacter pylori* is still low in Southern Austria. Int J Med Microbiol 2016;306: 206–211.
  171. Boehnke KF, Valdivieso M, Bussalleu A, et al. Antibiotic resistance among *Helicobacter pylori* clinical isolates in Lima, Peru. Infect Drug Resist 2017;10:85–90.
  172. Chunlertlith K, Limpapanasit U, Mairiang P, et al. Outcomes of a randomized controlled trial comparing modified high dose omeprazole and amoxicillin triple therapy with standard triple therapy for *Helicobacter*

- Pylori* eradication. Asian Pac J Cancer Prev 2017; 18:927–932.
173. Ferenc S, Gnus J, Koscielna M, et al. High antibiotic resistance of *Helicobacter pylori* and its effect on tailored and empiric eradication of the organism in Lower Silesia, Poland. Helicobacter 2017;22(2).
  174. Fu W, Song Z, Zhou L, et al. Randomized clinical trial: esomeprazole, bismuth, levofloxacin, and amoxicillin or cefuroxime as first-line eradication regimens for *Helicobacter pylori* infection. Digest Dis Sci 2017; 62:1580–1589.
  175. Gunnarsdottir AI, Gudjonsson H, Hardardottir H, et al. Antibiotic susceptibility of *Helicobacter pylori* in Iceland. Infect Dis 2017:1–8.
  176. Su J, Zhou X, Chen H, et al. Efficacy of 1st-line bismuth-containing quadruple therapies with levofloxacin or clarithromycin for the eradication of *Helicobacter pylori* infection: A 1-week, open-label, randomized trial. Medicine 2017;96(7):e5859.
  177. Vilaichone RK, Ratanachu ek T, Gamnarai P, et al. High fluoroquinolone resistant strains of *Helicobacter pylori* in the Golden triangle. Asian Pac J Cancer Prev 2017; 18:455–458.
  178. Zerbetto De Palma G, Mendiondo N, et al. Occurrence of mutations in the antimicrobial target genes related to levofloxacin, clarithromycin, and amoxicillin resistance in *Helicobacter pylori* isolates from Buenos Aires City. Microb Drug Resist 2017;23:351–358.



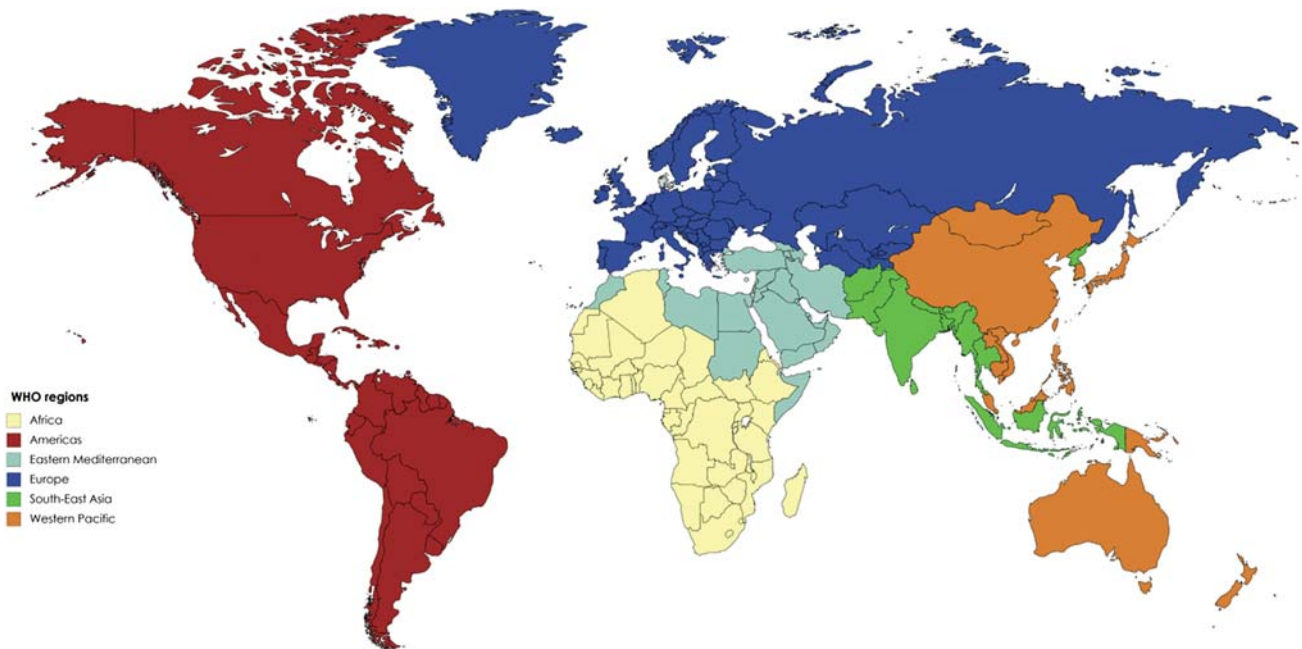

**Supplementary Figure 1.** Geographical distribution of the 6 WHO regions and member states for each region (alphabetical order). Africa Region (AFR), 47 countries: Algeria, Angola, Benin, Botswana, Burkina Faso, Burundi, Cameroon, Cabo Verde, Central African Republic, Chad, Comoros, Congo, Côte d'Ivoire, Democratic Republic of the Congo, Equatorial Guinea, Eritrea, Ethiopia, Gabon, Gambia, Ghana, Guinea, Guinea-Bissau, Kenya, Lesotho, Liberia, Madagascar, Malawi, Mali, Mauritania, Mauritius, Mozambique, Namibia, Niger, Nigeria, Rwanda, Sao Tome and Principe, Senegal, Seychelles, Sierra Leone, South Africa, South Sudan, Swaziland, Togo, Uganda, United Republic of Tanzania, Zambia, Zimbabwe. Americas Region (AMR), 35 countries: Antigua and Barbuda, Argentina, Bahamas, Barbados, Belize, Bolivia, Brazil, Canada, Chile, Colombia, Costa Rica, Cuba, Dominica, Dominican Republic, Ecuador, El Salvador, Grenada, Guatemala, Guyana, Haiti, Honduras, Jamaica, Mexico, Nicaragua, Panama, Paraguay, Peru, Saint Kitts and Nevis, Saint Lucia, Saint Vincent and the Grenadines, Suriname, Trinidad and Tobago, United States of America, Uruguay, Venezuela. Eastern Mediterranean Region (EMR), 21 countries: Afghanistan, Bahrain, Djibouti, Egypt, Iran (Islamic Republic of), Iran, Jordan, Kuwait, Lebanon, Libya, Morocco, Oman, Pakistan, Qatar, Saudi Arabia, Somalia, Sudan, Syrian Arab Republic, Tunisia, United Arab Emirates, Yemen. Europe Region (EUR), 48 countries: Albania; Andorra; Armenia; Austria; Azerbaijan; Belarus; Belgium; Bosnia and Herzegovina; Bulgaria; Croatia; Cyprus; Czech Republic; Denmark; Estonia; Finland; France; Georgia; Germany; Greece; Hungary; Iceland; Ireland; Israel; Italy; Kazakhstan; Kyrgyzstan; Latvia; Lithuania, Luxembourg, Malta, Monaco, Montenegro, Netherlands, Norway, Poland, Portugal, Republic of Moldova, Romania, Russian Federation, San Marino, Serbia, Slovakia, Slovenia, Spain, Sweden, Switzerland, Tajikistan, The former Yugoslav Republic of Macedonia, Turkey, Turkmenistan, Ukraine, United Kingdom, Uzbekistan. South-East Asia Region (SEAR), 10 countries: Bangladesh, Bhutan, Democratic People's Republic of Korea, India, Indonesia, Maldives, Myanmar, Nepal, Sri Lanka, Thailand, Timor-Leste. Western Pacific Region (WPR), 27 countries: Australia, Brunei Darussalam, Cambodia, China, Cook Islands, Fiji, Japan, Kiribati, Lao People's Democratic Republic, Malaysia, Marshall Islands, Micronesia (Federated States of), Mongolia, Nauru, New Zealand, Niue, Palau, Papua New Guinea, Philippines, Republic of Korea, Samoa, Singapore, Solomon Islands, Tonga, Tuvalu, Vanuatu, Viet Nam.



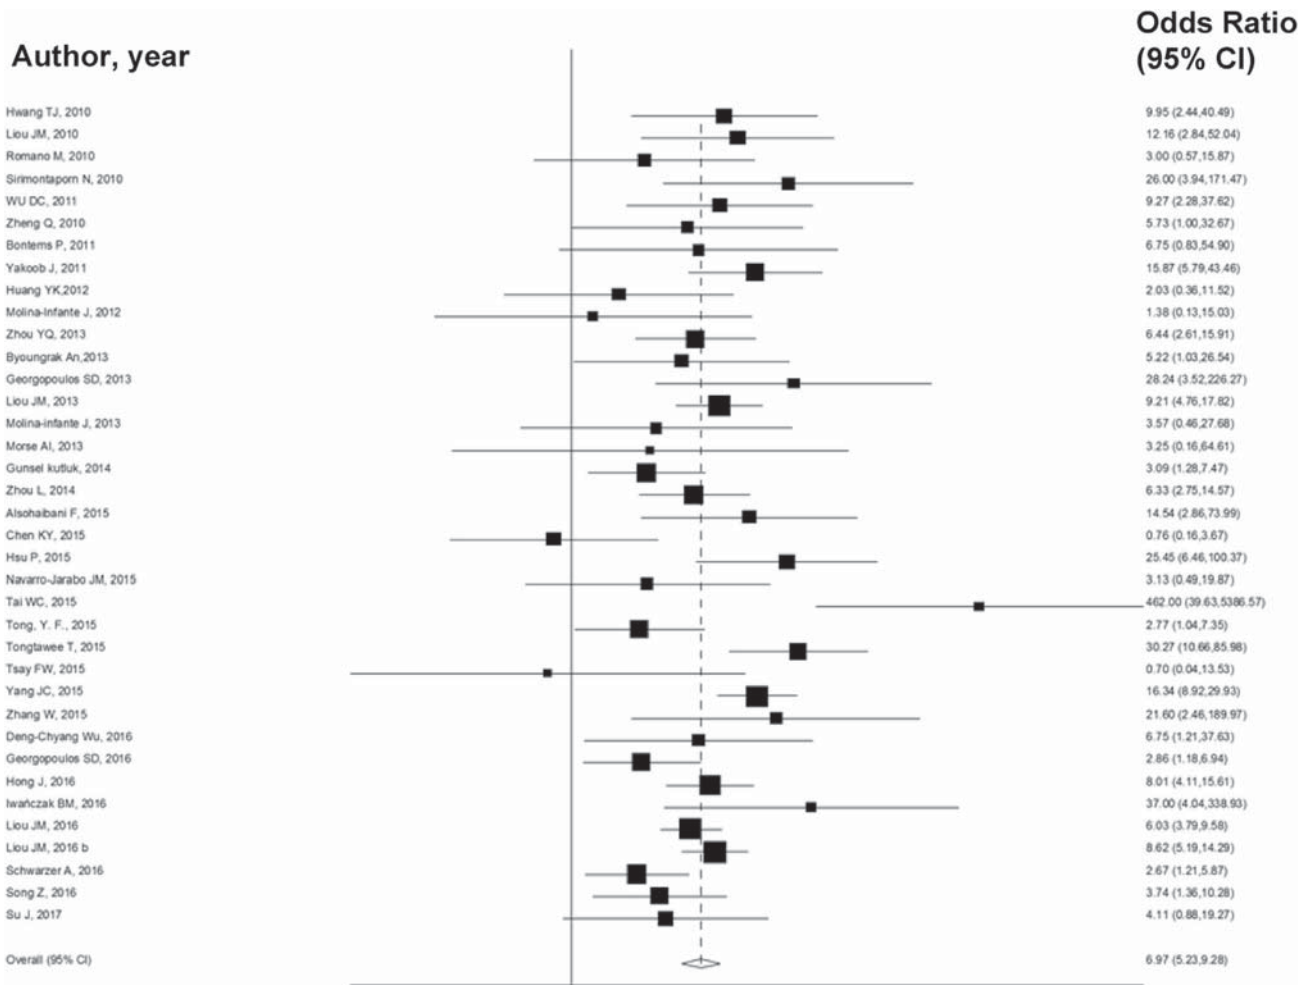

1

Heterogeneity:  $I^2$  53,4%- P < 0.001

Supplementary Figure 2. Summary forest plot of the odds ratios associating treatment failure and clarithromycin resistance.

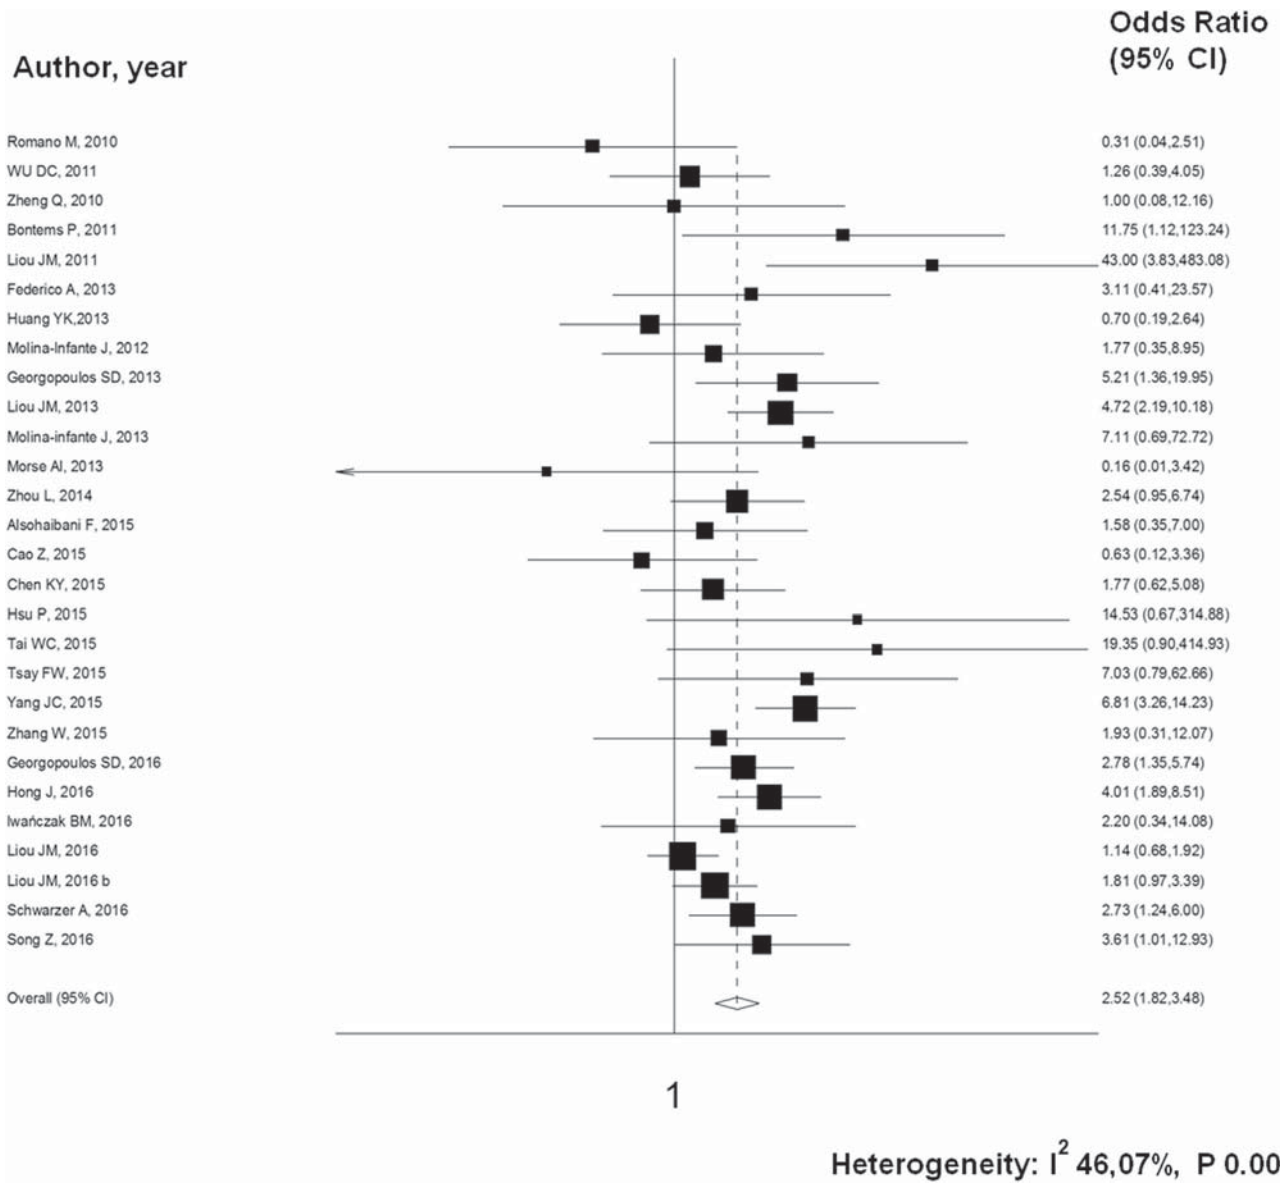

**Supplementary Figure 3.** Summary forest plot of the odds ratios associating treatment failure and metronidazole resistance.

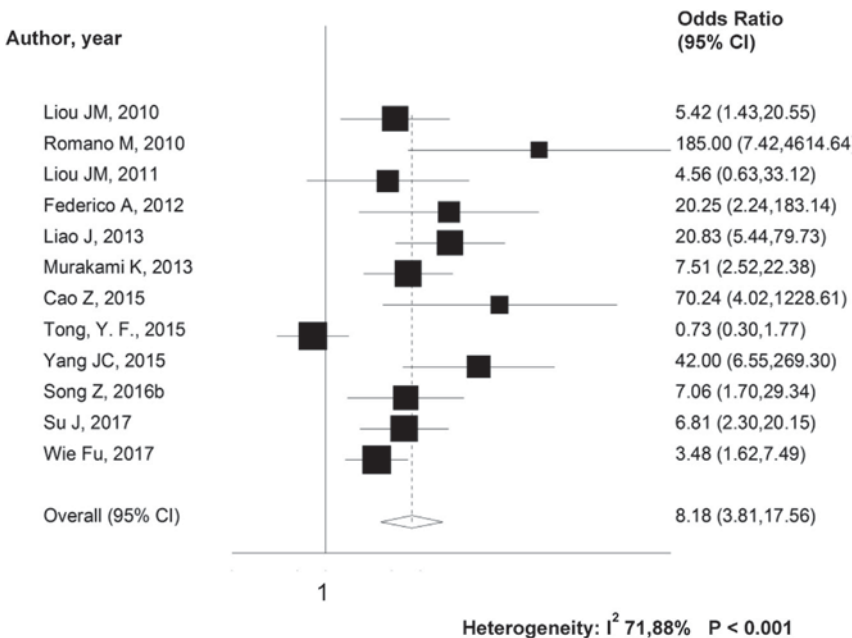

**Supplementary Figure 4.** Summary forest plot of the odds ratios for studies associating treatment failure and levofloxacin resistance.

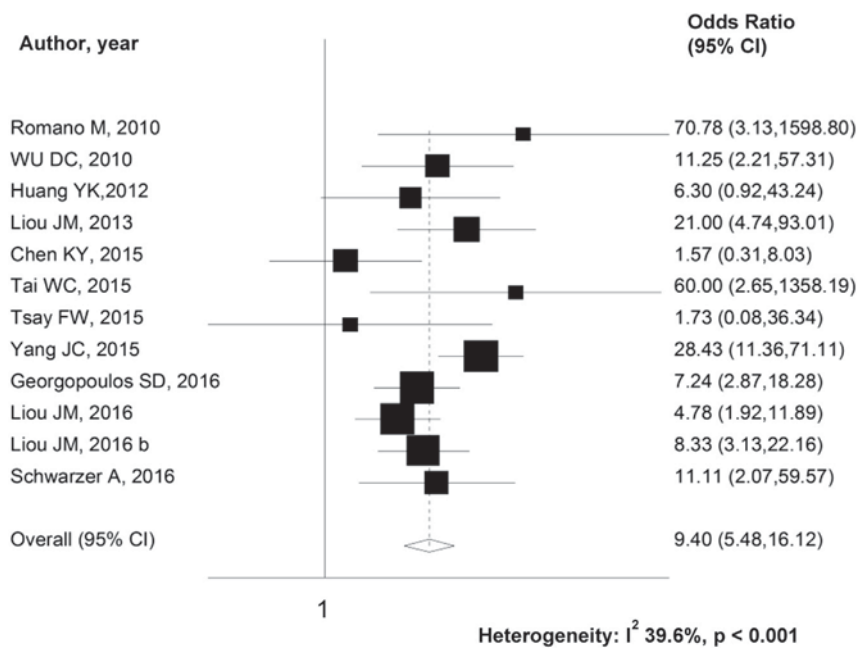

**Supplementary Figure 5.** Summary forest plot of the odds ratios for studies associating treatment failure and clarithromycin plus metronidazole resistance.

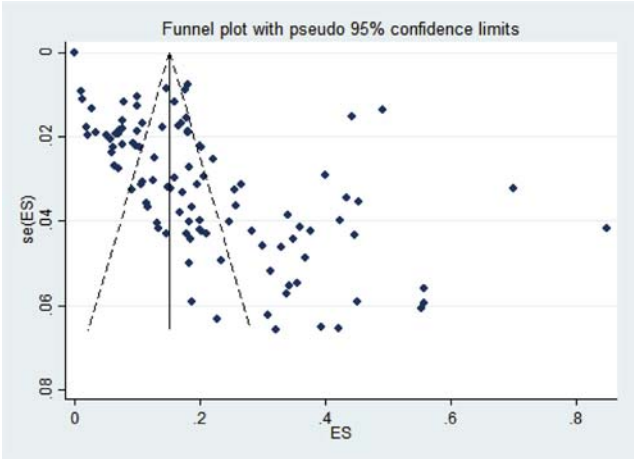

**Supplementary Figure 6.** Funnel plot of the meta-analysis on overall *Helicobacter pylori* primary resistance to clarithromycin (104 studies included, Egger's test for small study effect  $P < .01$ ). ES, effect size.



**Supplementary Table 1.** Quality Assessment of Included Studies**1. Was the study's target population a close representation of the target population? Y/N**

The target population refers to the group people entities to which the results of the study will be generalized. Studies providing data from several hospitals across the nation can be well representative of the national situation in terms of resistance prevalence.

**2. Were the study participants recruited in an appropriate way? Y/N**

Prospective consecutive enrollment (no random selection)

**3. Was the sample size adequate? Y/N**

We considered adequate studies computing their own sample size calculation or, if not mentioned, we deemed as adequate studies including at least 250 isolates. We based this cutoff on the following calculation:

We supposed a prevalence of clarithromycin resistance of 25% (based on results of a previous meta-analysis), with the width of the 95% CI, 0.10, an accuracy of  $\pm 0.05$ .

- The expected isolates proportion  $P = .25$
- The desired width of the CI ( $d$ ) = 0.10
- The confidence level = 95%

$$n = 1.962 \times 4 p (1-p) / d^2$$

$$n = 15.37 \times 0.25 (1-0.25) / 0.10^2$$

$$n = 288$$

**4. Were the study subjects' characteristics described in detail? Y/N**

The question aims at assessing whether and how the sociodemographic features (age, sex, and race) and clinical features (type and grade of *Helicobacter pylori*-related disease) were reported in the study.

**5. Was the data analysis conducted with sufficient coverage of the identified sample? Y/N**

Are resistance results provided for all the isolates?

**6. Were objective, standard criteria used for the measurement of the condition? Y/N**

Several diagnostics tools were used with satisfying sensitivity and specificity % in reporting prevalence data. New and not well-defined diagnostic technique can provide unreliable data.

**7. Was the condition measured reliably? Y/N**

The type of antimicrobial susceptibility testing (phenotypic and/or genotypic) and the breakpoint systems referred to the definition of resistance should be reported.

**8. Are all important confounding factors/subgroups/differences identified and accounted for? Y/N**

The type of resistance (primary or secondary) should be reported. Previous administration of antibiotics/anti-acid should be reported. In case of secondary resistance, the previous antibiotic treatment should be provided.

The following points were deemed as redundant for the purpose of this systematic review.

**1. Was there appropriate statistical analysis? NA****2. Were subpopulations identified using objective criteria? NA**

n, no; NA, not applicable; Y, yes.

**Supplementary Table 2.** Patients Demographic and Clinical Features

| Characteristics                           | Data             |
|-------------------------------------------|------------------|
| Age, y, median (IQR)                      | 48 (43–51)       |
| Male sex, %, mean (SD)                    | 49 (9)           |
| Population type, n (%)                    |                  |
| Pediatrics                                | 2416 (4.5)       |
| Adults                                    | 45,021 (84.0)    |
| Both or not specified                     | 6146 (11.5)      |
| Any previous eradication treatment, n (%) |                  |
| Naïve patients                            | 29,094 (54.0)    |
| Pretreated patients                       | 5676 (11.0)      |
| Both or not specified                     | 18,813 (35.0)    |
| Endoscopic findings, median (IQR)         |                  |
| NUD                                       | 70.2 (38.5–83.9) |
| PUD                                       | 25.5 (12.9–45.3) |

IQR, interquartile range; NUD, non-ulcer dyspepsia; PUD, peptic ulcer disease; SD, standard deviation.

**Supplementary Table 3.** Pooled Prevalence of Antibiotic Resistance by Country, World Health Organization Region Africa

| Antibiotic, country<br>(no. of studies) | Pooled prevalence, % | 95% CI |
|-----------------------------------------|----------------------|--------|
| Clarithromycin                          |                      |        |
| Cameroon (1)                            | 45                   | 36–53  |
| Senegal (1)                             | 1                    | 0–5    |
| Congo (1)                               | 2                    | 0–9    |
| Metronidazole                           |                      |        |
| Cameroon (1)                            | 93                   | 88–96  |
| Senegal (1)                             | 85                   | 77–91  |
| Levofloxacin                            |                      |        |
| Senegal (1)                             | 15                   | 9–23   |
| Congo (1)                               | 50                   | 34–66  |
| Amoxicillin                             |                      |        |
| Cameroon (1)                            | 86                   | 79–91  |
| Senegal (1)                             | 0                    | 0–3    |
| Tetracycline                            |                      |        |
| Cameroon (1)                            | 44                   | 36–52  |
| Senegal (1)                             | 0                    | 0–3    |

**Supplementary Table 4.** Pooled Prevalence of Antibiotic Resistance by Country, World Health Organization Region Americas

| Antibiotic, country<br>(no. of studies) | Pooled prevalence, % | 95% CI |
|-----------------------------------------|----------------------|--------|
| Clarithromycin                          |                      |        |
| Argentina (1)                           | 7                    | 4–12   |
| Brazil (6)                              | 16                   | 14–19  |
| Canada (2)                              | 0                    | 0–2    |
| Colombia (2)                            | 6                    | 4–8    |
| Peru (1)                                | 36                   | 26–47  |
| USA (3)                                 | 22                   | 7–37   |
| Metronidazole                           |                      |        |
| Argentina (1)                           | 8                    | 5–12   |
| Brazil (2)                              | 40                   | 33–48  |
| Canada (2)                              | 12                   | 5–19   |
| Peru (1)                                | 62                   | 51–72  |
| USA (2)                                 | 20                   | 13–27  |
| Levofloxacin                            |                      |        |
| Argentina (1)                           | 9                    | 5–13   |
| Brazil (3)                              | 10                   | 5–15   |
| Peru (1)                                | 36                   | 26–47  |
| USA (2)                                 | 37                   | 23–39  |
| Amoxicillin                             |                      |        |
| Argentina (1)                           | 2                    | 1–5    |
| Brazil (3)                              | 7                    | 1–13   |
| Colombia (1)                            | 4                    | 2–9    |
| Peru (1)                                | 33                   | 23–44  |
| Tetracycline                            |                      |        |
| Peru (1)                                | 4                    | 1–11   |
| CLA+MET                                 |                      |        |
| Canada (1)                              | 3                    | 0–13   |

CLA+MET, clarithromycin and metronidazole.

**Supplementary Table 5.** Pooled Prevalence of Antibiotic Resistance by Country, World Health Organization Region Eastern Mediterranean

| Antibiotic, country<br>(no. of studies) | Pooled prevalence, % | 95% CI |
|-----------------------------------------|----------------------|--------|
| Clarithromycin                          |                      |        |
| Egypt (2)                               | 56                   | 47–64  |
| Iran (15)                               | 21                   | 15–28  |
| Morocco (1)                             | 25                   | 20–32  |
| Pakistan (6)                            | 40                   | 32–49  |
| Saudi Arabia (1)                        | 23                   | 15–34  |
| Metronidazole                           |                      |        |
| Egypt (1)                               | 63                   | 51–73  |
| Iran (14)                               | 63                   | 56–71  |
| Morocco (1)                             | 40                   | 33–47  |
| Pakistan (4)                            | 62                   | 51–74  |
| Saudi Arabia (1)                        | 49                   | 37–60  |
| Levofloxacin                            |                      |        |
| Iran (9)                                | 25                   | 14–37  |
| Morocco (1)                             | 11                   | 7–16   |
| Pakistan (5)                            | 24                   | 0–49   |
| Saudi Arabia (1)                        | 13                   | 4–31   |
| Amoxicillin                             |                      |        |
| Iran (13)                               | 14                   | 9–19   |
| Morocco (1)                             | 0                    | 0–2    |
| Pakistan (3)                            | 25                   | 0–52   |
| Saudi Arabia (1)                        | 15                   | 6–32   |
| Tetracycline                            |                      |        |
| Iran (11)                               | 15                   | 9–22   |
| Morocco (1)                             | 0                    | 0–2    |
| Pakistan (3)                            | 12                   | 7–18   |
| CLA+MET                                 |                      |        |
| Iran (6)                                | 14                   | 5–23   |

CLA+MET, clarithromycin and metronidazole.

**Supplementary Table 6.** Pooled Prevalence of Antibiotic Resistance by Country, World Health Organization Region Europe

| Antibiotic, country<br>(no. of studies) | Pooled prevalence, % | 95% CI   |
|-----------------------------------------|----------------------|----------|
| <b>Clarithromycin</b>                   |                      |          |
| Austria (5)                             | 32                   | 12 to 52 |
| Belgium (7)                             | 36                   | 20 to 51 |
| Bulgaria (7)                            | 23                   | 17 to 28 |
| Croatia (2)                             | 14                   | 11 to 17 |
| France (8)                              | 43                   | 28 to 57 |
| Germany (5)                             | 13                   | 6 to 20  |
| Greece (5)                              | 36                   | 27 to 46 |
| Iceland (1)                             | 6                    | 3 to 12  |
| Ireland (3)                             | 31                   | 3 to 59  |
| Israel (12)                             | 47                   | 39 to 56 |
| Italy (7)                               | 15                   | 11 to 20 |
| Multicenter (3)                         | 17                   | 5 to 30  |
| Spain (12)                              | 19                   | 17 to 22 |
| The Netherlands (6)                     | 16                   | 14 to 19 |
| Turkey (4)                              | 28                   | 19 to 36 |
| United Kingdom (1)                      | 36                   | 30 to 42 |
| <b>Metronidazole</b>                    |                      |          |
| Austria (2)                             | 14                   | 10 to 19 |
| Belgium (7)                             | 40                   | 29 to 51 |
| Bulgaria (7)                            | 28                   | 22 to 35 |
| Croatia (2)                             | 11                   | 8 to 14  |
| France (6)                              | 65                   | 53 to 77 |
| Germany (5)                             | 37                   | 30 to 43 |
| Greece (4)                              | 38                   | 31 to 45 |
| Iceland (1)                             | 1                    | 0 to 5   |
| Ireland (2)                             | 31                   | 25 to 37 |
| Israel (12)                             | 57                   | 48 to 65 |
| Italy (6)                               | 26                   | 22 to 31 |
| Multicenter (3)                         | 32                   | 25 to 39 |
| United Kingdom (1)                      | 57                   | 51 to 63 |
| Poland (7)                              | 38                   | 24 to 51 |
| Turkey (1)                              | 35                   | 26 to 45 |
| The Netherlands (6)                     | 15                   | 11 to 19 |
| <b>Levofloxacin</b>                     |                      |          |
| Austria (2)                             | 11                   | 6 to 16  |
| Belgium (4)                             | 29                   | 18 to 41 |
| Bulgaria (7)                            | 10                   | 7 to 14  |
| Croatia (1)                             | 2                    | 1 to 5   |
| France (6)                              | 15                   | 12 to 18 |
| Germany (17)                            | 18                   | 15 to 22 |
| Greece (5)                              | 10                   | 6 to 13  |
| Iceland (1)                             | 6                    | 3 to 12  |
| Ireland (2)                             | 11                   | 6 to 16  |
| Israel (10)                             | 5                    | 3 to 7   |
| Italy (6)                               | 5                    | 3 to 7   |
| Multicenter (3)                         | 7                    | -1 to 16 |
| Poland (5)                              | 8                    | 2-14     |
| Spain (8)                               | 16                   | 14 to 18 |
| Turkey (1)                              | 30                   | 21 to 39 |
| United Kingdom (1)                      | 11                   | 8 to 16  |
| <b>Amoxicillin</b>                      |                      |          |
| Austria (2)                             | 0                    | 0 to 1   |
| Bulgaria (7)                            | 1                    | 0 to 1   |
| Croatia (1)                             | 0                    | 0 to 3   |
| France (2)                              | 0                    | 0 to 1   |
| Germany (1)                             | 0                    | 0 to 6   |
| Greece (4)                              | 0                    | 0 to 0   |

**Supplementary Table 6.** Continued

| Antibiotic, country<br>(no. of studies) | Pooled prevalence, % | 95% CI   |
|-----------------------------------------|----------------------|----------|
| Iceland (1)                             | 0                    | 0 to 4   |
| Ireland (2)                             | 0                    | 0 to 4   |
| Israel (2)                              | 4                    | 0 to 8   |
| Italy (2)                               | 0                    | 0 to 1   |
| Multicenter (3)                         | 0                    | 0 to 1   |
| Poland (5)                              | 0                    | 0 to 1   |
| Spain (8)                               | 0                    | 0 to 0   |
| United Kingdom (1)                      | 2                    | 1 to 5   |
| <b>Tetracycline</b>                     |                      |          |
| Austria (2)                             | 0                    | 0 to 1   |
| Bulgaria (6)                            | 3                    | 1 to 6   |
| France (2)                              | 0                    | 0 to 0   |
| Germany (1)                             | 0                    | 0 to 0   |
| Greece (4)                              | 0                    | 0 to 0   |
| Iceland (1)                             | 0                    | 0 to 4   |
| Ireland (1)                             | 0                    | 0 to 5   |
| Israel (2)                              | 2                    | 0 to 6   |
| Italy (2)                               | 0                    | 0 to 1   |
| Multicenter (3)                         | 0                    | 0 to 1   |
| Poland (2)                              | 0                    | 0 to 1   |
| Spain (6)                               | 0                    | 0 to 0   |
| United Kingdom (1)                      | 2                    | 1 to 4   |
| <b>CLA+MET</b>                          |                      |          |
| Belgium (1)                             | 4                    | 2 to 8   |
| Bulgaria (4)                            | 15                   | 6 to 24  |
| Germany (4)                             | 3                    | 2 to 5   |
| Greece (4)                              | 13                   | 6 to 21  |
| Iceland (1)                             | 0                    | 0 to 4   |
| Israel (12)                             | 30                   | 16 to 44 |
| Italy (6)                               | 8                    | 4 to 12  |
| Multicenter (1)                         | 3                    | 2 to 7   |
| Poland (5)                              | 8                    | 1 to 4   |
| Spain (1)                               | 10                   | 5 to 18  |
| United Kingdom (1)                      | 31                   | 25 to 37 |

CLA+MET, clarithromycin and metronidazole.

**Supplementary Table 7.** Pooled Prevalence of Antibiotic Resistance by Country, World Health Organization Region South-East Asia

| Antibiotic, country<br>(no. of studies) | Pooled prevalence, % | 95% CI |
|-----------------------------------------|----------------------|--------|
| <b>Clarithromycin</b>                   |                      |        |
| Bangladesh (1)                          | 39                   | 28–52  |
| Bhutan (1)                              | 0                    | 0–4    |
| India (1)                               | 5                    | 2–13   |
| Indonesia (1)                           | 9                    | 4–18   |
| Thailand (9)                            | 19                   | 2–36   |
| <b>Metronidazole</b>                    |                      |        |
| Bangladesh (1)                          | 95                   | 85–98  |
| Bhutan (1)                              | 83                   | 75–89  |
| India (1)                               | 100                  | 94–100 |
| Indonesia (1)                           | 47                   | 36–58  |
| Thailand (6)                            | 44                   | 28–60  |
| <b>Levofloxacin</b>                     |                      |        |
| Bangladesh (1)                          | 66                   | 53–77  |
| Bhutan (1)                              | 5                    | 3–11   |
| Indonesia (1)                           | 31                   | 22–42  |
| Thailand (4)                            | 19                   | 14–23  |
| <b>Amoxicillin</b>                      |                      |        |
| Bangladesh (1)                          | 4                    | 1–12   |
| Bhutan (1)                              | 0                    | 0–4    |
| India (1)                               | 65                   | 53–76  |
| Indonesia (1)                           | 5                    | 2–13   |
| Thailand (2)                            | 1                    | 0–3    |
| <b>Tetracycline</b>                     |                      |        |
| Bangladesh (1)                          | 0                    | 0–7    |
| Bhutan (1)                              | 0                    | 0–4    |
| India (1)                               | 0                    | 0–6    |
| Indonesia (1)                           | 3                    | 1–9    |
| Thailand (2)                            | 0                    | 0–1    |
| <b>CLA+MET</b>                          |                      |        |
| Bangladesh (1)                          | 6                    | 1–10   |
| Thailand (1)                            | 9                    | 4–19   |
| Thailand (1)                            | 4                    | 1–13   |

CLA+MET, clarithromycin and metronidazole.

**Supplementary Table 8.** Pooled Prevalence of Antibiotic Resistance by Country, World Health Organization Region Western Pacific

| Antibiotic, country<br>(no. of studies) | Pooled prevalence, % | 95% CI |
|-----------------------------------------|----------------------|--------|
| <b>Clarithromycin</b>                   |                      |        |
| Australia (5)                           | 96                   | 92–99  |
| China (47)                              | 37                   | 30–43  |
| Japan (3)                               | 28                   | 25–32  |
| Laos (1)                                | 13                   | 8–20   |
| Malaysia (3)                            | 5                    | 0–10   |
| New Zealand (1)                         | 7                    | 4–12   |
| Singapore (3)                           | 16                   | 12–19  |
| South Korea (7)                         | 18                   | 10–25  |
| Taiwan (38)                             | 26                   | 22–31  |
| Vietnam (5)                             | 63                   | 37–88  |
| <b>Metronidazole</b>                    |                      |        |
| Australia (5)                           | 68                   | 63–73  |
| China (44)                              | 77                   | 74–79  |
| Malaysia (2)                            | 82                   | 75–88  |
| New Zealand (1)                         | 49                   | 38–61  |
| Singapore (3)                           | 44                   | 39–48  |
| South Korea (7)                         | 40                   | 3–50   |
| Taiwan (37)                             | 31                   | 27–35  |
| Vietnam (5)                             | 58                   | 40–76  |
| <b>Levofloxacin</b>                     |                      |        |
| Australia (5)                           | 5                    | 3–7    |
| China (31)                              | 33                   | 29–38  |
| Laos (1)                                | 13                   | 8–21   |
| Singapore (3)                           | 13                   | 10–15  |
| South Korea (7)                         | 28                   | 21–35  |
| Taiwan (31)                             | 15                   | 13–17  |
| Vietnam (5)                             | 32                   | 20–43  |
| <b>Amoxicillin</b>                      |                      |        |
| Australia (5)                           | 0                    | 0–1    |
| China (32)                              | 1                    | 0–1    |
| Malaysia (2)                            | 0                    | 0–1    |
| New Zealand (1)                         | 5                    | 2–13   |
| Singapore (3)                           | 4                    | 2–6    |
| South Korea (7)                         | 4                    | 2–5    |
| Taiwan (38)                             | 1                    | 1–1    |
| Vietnam (5)                             | 2                    | 0–4    |
| <b>Tetracycline</b>                     |                      |        |
| Australia (5)                           | 0                    | 0–1    |
| China (15)                              | 2                    | 1–3    |
| Malaysia (1)                            | 12                   | 6–24   |
| New Zealand (1)                         | 0                    | 0–5    |
| Singapore (3)                           | 7                    | 5–9    |
| South Korea (7)                         | 4                    | 1–6    |
| Taiwan (18)                             | 2                    | 1–3    |
| Vietnam (5)                             | 17                   | 4–31   |
| <b>CLA+MET</b>                          |                      |        |
| China (15)                              | 14                   | 11–17  |
| New Zealand (1)                         | 8                    | 4–17   |
| Singapore (3)                           | 4                    | 1–8    |
| South Korea (3)                         | 4                    | 1–8    |
| Taiwan (18)                             | 10                   | 7–13   |
| Vietnam (2)                             | 15                   | 8–23   |

CLA+MET, clarithromycin and metronidazole.



**Supplementary Table 9.** Heterogeneity Assessment by Studies' Country

| Variable                                     | Country         | Pooled prevalence, % | 95% CI | $I^2$ % |
|----------------------------------------------|-----------------|----------------------|--------|---------|
| Clarithromycin resistance                    | Australia       | 96                   | 92–99  | 61      |
|                                              | Brazil          | 16                   | 14–19  | 0       |
|                                              | Italy           | 15                   | 11–20  | 66      |
|                                              | Turkey          | 28                   | 19–36  | 66      |
| Metronidazole resistance                     | Australia       | 68                   | 63–73  | 0       |
|                                              | Germany         | 37                   | 30–43  | 64      |
|                                              | Greece          | 38                   | 31–45  | 47      |
|                                              | The Netherlands | 15                   | 11–19  | 60      |
| Levofloxacin resistance                      | Australia       | 5                    | 3–7    | 0       |
|                                              | France          | 15                   | 12–18  | 0       |
|                                              | Greece          | 10                   | 6–13   | 39      |
|                                              | Italy           | 5                    | 3–7    | 16      |
|                                              | Poland          | 8                    | 2–14   | 63      |
|                                              | Spain           | 16                   | 14–18  | 62      |
| Clarithromycin plus metronidazole resistance | Germany         | 3                    | 2–5    | 0       |
|                                              | Italy           | 8                    | 4–12   | 61      |

NOTE. Only pooled prevalence for countries with  $I^2$  value < 75% are reported.
